# Supplementary material for: Cost of management of severe pneumonia in young children: systematic analysis
Source: PubMed Central journal article supplement (PMC4871066; doi:10.7189/jogh.06.010408), 2016-06
Supplement: jogh-06-010408-s001.pdf [file jogh-06-010408-s001.pdf]

# Online Supplementary Document

Zhang et al. Cost of management of severe pneumonia in young children: systematic analysis

J Glob Health 2016;6:010408

## Appendix 1 Search Strategy

1) MEDLINE (via Ovid®): 1948 to October 2013

| No. | Searches                                                                   |
|-----|----------------------------------------------------------------------------|
| 1   | exp Pneumonia/                                                             |
| 2   | lrti.tw.                                                                   |
| 3   | alri.tw.                                                                   |
| 4   | ari.tw.                                                                    |
| 5   | pneumonia\$.tw.                                                            |
| 6   | 1 or 2 or 3 or 4 or 5                                                      |
| 7   | exp Therapeutics/                                                          |
| 8   | treat\$.tw.                                                                |
| 9   | (care adj3 in-patient\$.tw.                                                |
| 10  | (care adj3 out-patient\$.tw.                                               |
| 11  | (care adj3 hospital\$.tw.                                                  |
| 12  | (care adj3 communit\$.tw.                                                  |
| 13  | 7 or 8 or 9 or 10 or 11 or 12                                              |
| 14  | exp Economics/                                                             |
| 15  | cost\$.tw.                                                                 |
| 16  | econom\$.tw.                                                               |
| 17  | expend\$.tw.                                                               |
| 18  | 14 or 15 or 16 or 17                                                       |
| 19  | 6 and 13 and 18                                                            |
| 20  | limit 19 to ("all infant (birth to 23 months)" or "preschool child (2 to 5 |

2) EMBASE (via Ovid®): 1980 to October 2013

| No. | Searches                                                             |
|-----|----------------------------------------------------------------------|
| 1   | exp pneumonia/                                                       |
| 2   | lrti.tw.                                                             |
| 3   | alri.tw.                                                             |
| 4   | ari.tw.                                                              |
| 5   | pneumonia\$.tw.                                                      |
| 6   | 1 or 2 or 3 or 4 or 5                                                |
| 7   | exp therapy/                                                         |
| 8   | (care adj3 in-patient\$.tw.                                          |
| 9   | (care adj3 out-patient\$.tw.                                         |
| 10  | (care adj3 hospital\$.tw.                                            |
| 11  | (care adj3 communit\$.tw.                                            |
| 12  | treat\$.tw.                                                          |
| 13  | 7 or 8 or 9 or 10 or 11 or 12                                        |
| 14  | exp economic aspect/                                                 |
| 15  | cost\$.tw.                                                           |
| 16  | econom\$.tw.                                                         |
| 17  | expend\$.tw.                                                         |
| 18  | 14 or 15 or 16 or 17                                                 |
| 19  | 6 and 13 and 18                                                      |
| 20  | limit 19 to (infant <to one year> or preschool child <1 to 6 years>) |

3) DARE, NHS EED & NHS HTA (via CRD – [www.crd.york.ac.uk](http://www.crd.york.ac.uk)): All records to October 2013

| No. | Searches                        |
|-----|---------------------------------|
| 1   | MeSH Pneumonia EXPLODE 1 2      |
| 2   | pneumonia*                      |
| 3   | lrti                            |
| 4   | alri                            |
| 5   | ari                             |
| 6   | #1 OR #2 OR #3 OR #4 OR #5      |
| 7   | MeSH Therapeutics EXPLODE 1     |
| 8   | treat*                          |
| 9   | therap*                         |
| 10  | #7 OR #8 OR #9                  |
| 11  | MeSH Economics EXPLODE 1 2      |
| 12  | cost*                           |
| 13  | econom*                         |
| 14  | expend*                         |
| 15  | #11 OR #12 OR #13 OR #14        |
| 16  | MeSH Child, Preschool EXPLODE 1 |
| 17  | MeSH Infant EXPLODE 1           |
| 18  | #16 OR #17                      |
| 19  | #6 AND #10 AND #15 AND #18      |

4) The Cochrane Library (via Wiley Online Library – [onlinelibrary.wiley.com](http://onlinelibrary.wiley.com)). All records to October 2013

| No. | Searches                                           |
|-----|----------------------------------------------------|
| 1   | MeSH descriptor Pneumonia explode all trees        |
| 2   | pneumonia*                                         |
| 3   | lrti                                               |
| 4   | alri                                               |
| 5   | (#1 OR #2 OR #3 OR #4)                             |
| 6   | MeSH descriptor Therapeutics explode all trees     |
| 7   | treat*                                             |
| 8   | therap*                                            |
| 9   | (#6 OR #7 OR #8)                                   |
| 10  | MeSH descriptor Economics explode all trees        |
| 11  | cost*                                              |
| 12  | econom*                                            |
| 13  | expend*                                            |
| 14  | (#10 OR #11 OR #12 OR #13)                         |
| 15  | MeSH descriptor Child, Preschool explode all trees |
| 16  | MeSH descriptor Infant explode all trees           |
| 17  | (#15 OR #16)                                       |
| 18  | (#5 AND #9 AND #14 AND #17)                        |

**Appendix 2. Inclusion and exclusion criteria for published studies.**

| Inclusion required ALL of the following:                                                                                                                                                                                                                                                               | Exclusion if ONE of the following was true:                                                                                                                                                                              |
|--------------------------------------------------------------------------------------------------------------------------------------------------------------------------------------------------------------------------------------------------------------------------------------------------------|--------------------------------------------------------------------------------------------------------------------------------------------------------------------------------------------------------------------------|
| <ul style="list-style-type: none"> <li>• English language</li> <li>• Empirical cost data presented</li> <li>• All-cause pneumonia</li> <li>• Treatment of pneumonia using antibiotics</li> <li>• Reporting specifically for children aged 0–59 months</li> <li>• Unbiased population sample</li> </ul> | <ul style="list-style-type: none"> <li>• “Vaccine–” or “Palivizumab” trials</li> <li>• Specially selected cohorts</li> <li>• “Non–standard” interventions</li> <li>• Review articles and conference abstracts</li> </ul> |

**Appendix 3 Modified Drummond checklist for quality assessment for published studies**

|    |                                                                      |
|----|----------------------------------------------------------------------|
| 1  | The question and perspective are clearly stated                      |
| 2  | It is a cost–study                                                   |
| 3  | Quantity of resources used and unit costs are reported separately    |
| 4  | Data sources are clearly reported                                    |
| 5  | Currency & Price (including price year) are documented               |
| 6  | Time horizon of costs is stated                                      |
| 7  | Consideration of discounting is documented and justified             |
| 8  | Details of statistical tests and result errors are clearly described |
| 9  | Sensitivity analysis is carried out (and adjustments stated)         |
| 10 | A comparison is made between two alternatives                        |
| 11 | A standardised definition of pneumonia is used (ICD/IMCI/WHO etc)    |
| 12 | The answer to the study question is clearly stated (and valid)       |
| 13 | Conclusions are drawn, and relevant limitations are raised.          |

**Appendix 4 Costing spreadsheet and practical guide (see separate file attached)**

**Appendix 5 Results of quality assessment score**

| <b>Authors</b>                     | <b>Year</b> | <b>Quality Score</b> | <b>Unaddressed checklist items</b> |
|------------------------------------|-------------|----------------------|------------------------------------|
| <b>Al-Eidan,et al (22)</b>         | 1999        | 8                    | 2,3,7,9,11                         |
| <b>Alamgir, et al (18)</b>         | 2010        | 7                    | 3,5,7,9,10,11                      |
| <b>Anh,D et al (31)</b>            | 2010        | 12                   | 10                                 |
| <b>Ashraf,et al (24)</b>           | 2010        | 8                    | 2,3,4,7,9,                         |
| <b>Aurangzeb &amp; Hameed (27)</b> | 2003        | 9                    | 7,8,9                              |
| <b>Ayieko et al (19)</b>           | 2009        | 11                   | 7,11                               |
| <b>Chola et al (35)</b>            | 2009        | 8                    | 7,8,9,11,12                        |
| <b>Constenla,D. (14)</b>           | 2007        | 10                   | 7,8,9                              |
| <b>Ehlken et al (12)</b>           | 2005        | 9                    | 5,7,9,11                           |
| <b>Hussain,et al (29)</b>          | 2008        | 8                    | 1,3,7,8,9                          |
| <b>Hussain,et al (28)</b>          | 2006        | 7                    | 3,6,7,8,9,11                       |
| <b>Jha et al (33)</b>              | 1998        | 8                    | 2,3,6,9,11                         |
| <b>Khuri-Bulos,et al (38)</b>      | 2010        | 3                    | 1,2,3,4,5,7,8,9,11,12              |
| <b>Lambert et al (13)</b>          | 2008        | 6                    | 1,2,3,7,9,11,12                    |
| <b>Madsen,et al (25)</b>           | 2009        | 11                   | 7,9                                |
| <b>Newall &amp; Scuffham (23)</b>  | 2008        | 9                    | 3,7,8,10                           |
| <b>Sahu,et al (26)</b>             | 2002        | 3                    | 2,3,4,5,7,8,9,10,11,13             |
| <b>Toan,et al (32)</b>             | 2001        | 6                    | 3,5,7,8,9,11,13                    |
| <b>Temple et al (37)</b>           | 2012        | 11                   | 7,9                                |
| <b>Sadruddin et al (30)</b>        | 2012        | 8                    | 3,5,7,8,9                          |
| <b>Alvis-Guzman et al (36)</b>     | 2013        | 8                    | 3,6,7,9,10                         |
| <b>Brotans et al (15)</b>          | 2013        | 8                    | 3,6,7,9,11                         |
| <b>Kichin et al (34)</b>           | 2011        | 8                    | 3,5,6,7,9                          |
| <b>Sinha et al (16)</b>            | 2012        | 11                   | 9,11                               |
|                                    | Mean        | 8.21                 |                                    |
